# Supplementary material for: AMPK activation attenuates inflammatory pain through inhibiting NF-κB activation and IL-1β expression
Source: PubMed Central journal article supplement (PMC6373126; doi:10.1186/s12974-019-1411-x), 2019-02-12

**a** Mice behavioral experiment of AICAR effects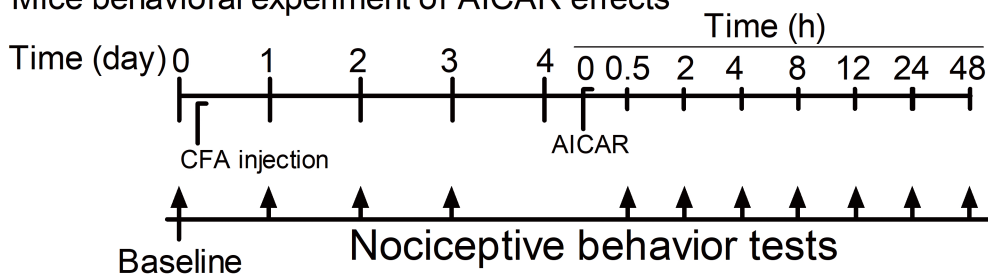**b** Mice experiment of AICAR effects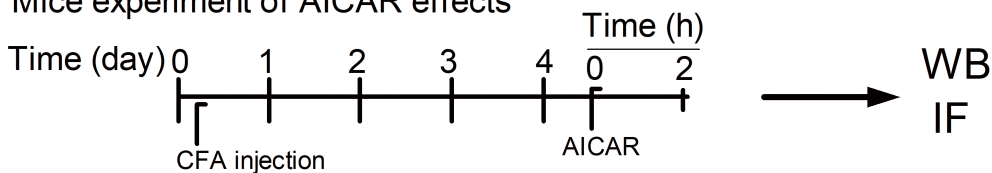**c** Mice behavioral experiment of IL-1ra effects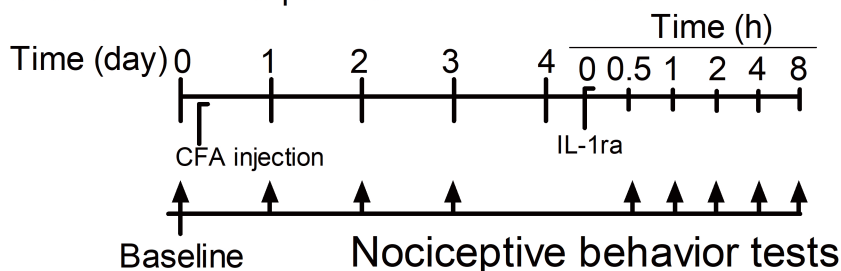**d** Mice behavioral experiment of Compound C/ AICAR effects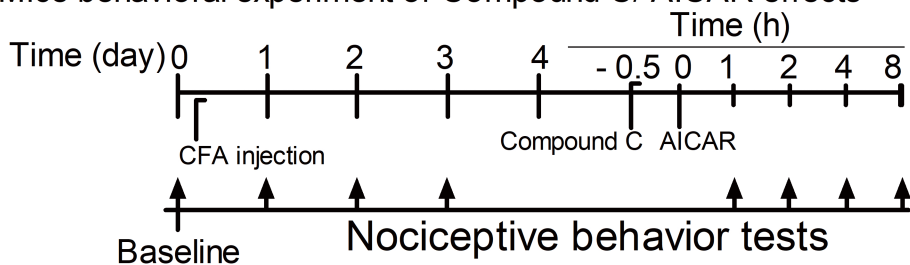**e** Mice experiment of Compound C/ AICAR effects (including CX3CR1-GFP mice)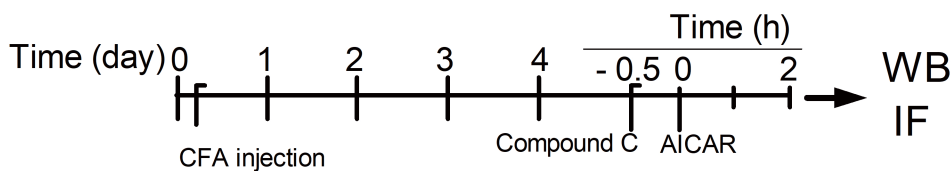**f** Mice experiment of AMPK $\alpha$  shRNA effects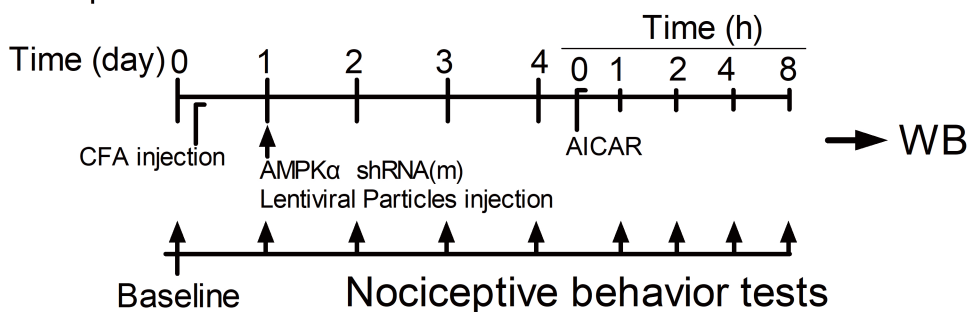

Supplement: 12974_2019_1411_MOESM1_ESM.pdf [file 12974_2019_1411_MOESM1_ESM.pdf]
